# Supplementary material for: In-vivo loss of carbapenem resistance by extensively drug-resistant Klebsiella pneumoniae during treatment via porin expression modification
Source: PubMed Central journal article supplement (PMC5532282; doi:10.1038/s41598-017-06503-6), 2017-07-27
Supplement: 41598_2017_6503_MOESM1_ESM.pdf [file 41598_2017_6503_MOESM1_ESM.pdf]

***In-vivo* loss of carbapenem resistance by extensively drug-resistant  
*Klebsiella pneumoniae* during treatment *via* porin expression modification**

Suzanne Bialek-Davenet, Noémie Mayer, Julia Vergalli, Marion Duprilot, Sylvain Brisse,  
Jean-Marie Pagès, Marie-Hélène Nicolas-Chanoine

**Supplementary table (Table S1).** List of primers used in this study

| Assay and target region           | Primer            | Sequence (5'-3')       | Reference    |
|-----------------------------------|-------------------|------------------------|--------------|
| <b>Sequencing</b>                 |                   |                        |              |
| <i>ompK35</i>                     | ompK35F           | CAGACACCAAACCTCTCATCA  | This work    |
|                                   | ompK35R           | TCAGGTTAACGGGAGAATAA   |              |
|                                   | ompK35sqF         | GCGTCGATCAGAAAGCT      |              |
|                                   | ompK35sqR         | GCTTCGGCTTTGTCGCCA     |              |
| <i>ompK36</i>                     | ompK36F           | TTGCAGCACAAATGAAATAGC  | This work    |
|                                   | ompK36R           | CAAGAGTATACCAGCGAGGT   |              |
|                                   | ompK36sqF         | CGACGTTCTGCCGGAATT     |              |
|                                   | ompK36sqR         | AGAGTTACGGTAGGTTGC     |              |
| Inter <i>rarA</i> and <i>oxqA</i> | <i>rarA</i> +intF | ACGGACCGTTCACTATGTCG   | 37           |
|                                   | <i>rarA</i> +intR | GACGAGCAGAAAGGAGAGCA   |              |
| <b>Sequencing and cloning</b>     |                   |                        |              |
| <i>oqxR</i>                       | oqxRF             | TTCTGACGCCGGTGTTTTA    | 37           |
|                                   | oqxRR             | CTGCGGTGCCAAAAGAACA    |              |
| <i>pstS</i>                       | pstSF             | CGGCGGTAGATGACAAACGA   | This work    |
|                                   | pstSR             | CCCCGCCATCTTCGTCAAAA   |              |
|                                   | pstSsqF           | AAAAATGGGATGACGAAGCG   |              |
|                                   | pstSsqR           | GGCGCGGCGGACCACGGCGA   |              |
| <i>phoU</i>                       | phoUF             | CGTGA CTACAACATGCAGC   | This work    |
|                                   | phoUR             | GCCGCGGGGTAAAACATATC   |              |
| <i>phoB</i>                       | phoBF             | CGTCGTGCTTCAA AATACCC  | This work    |
|                                   | phoBR             | TTCCATGACAGCCGTTCCAG   |              |
| <i>phoR</i>                       | phoRF             | TGGCCATGATCGTATGGTGC   | This work    |
|                                   | phoRR             | GCAGCGCACGCTCATTAAATA  |              |
|                                   | phoRsqF           | CGGAACTTTTTTCGCCAACGT  |              |
|                                   | phoRsqR           | CTGCTCCTGCATCATCTCCA   |              |
| <b>RT-PCR</b>                     |                   |                        |              |
| <i>acrB</i>                       | acrBF             | CGATAACCTGATGTACATGTCC | Bratu et al. |
|                                   | acrBR             | CCGACAACCATCAGGAAGCT   |              |
| <i>ramA</i>                       | ramAF             | ATCGTCGAGTGGATTGATGA   | 32           |
|                                   | ramAR             | AGATGCCATTTCAATACCC    |              |
| <i>oqxB</i>                       | oqxB1806F         | GAGCGAGATCGGGATGAATAC  | 37           |
|                                   | oqxB1890R         | CGGCGTGTGGTGA ACTG     |              |
| <i>rarA</i>                       | Kp02968F          | TGGATCGACAACCATCTTGA   | 23           |
|                                   | Kp02968R          | AAGGACTGCTGGGAGTCAAA   |              |
| <i>ompK35</i>                     | ompK35RTF         | TCCCTGCCCTGCTGGTAG     | Bratu et al. |
|                                   | ompK35RTR         | CTGGTGTCCG CATTGGTGG   |              |

|               |           |                            |              |
|---------------|-----------|----------------------------|--------------|
| <i>ompK36</i> | ompK36RTF | GCGACCAGACCTACATGCGT       | Bratu et al. |
|               | ompK36RTR | AGTCGAAAGAGCCCGCGTC        |              |
| <i>phoE</i>   | phoEF     | TGATGGGCTTTGTGGCTTC        | Bratu et al. |
|               | phoER     | CTTGCTGTCATAGTCGCTG        |              |
| <i>rpoB</i>   | rpoBF     | AAGGCGAATCCAGCTTGTTTCAGC   | Bratu et al. |
|               | rpoBR     | TGACGTTGCATGTTTCGCACCCATCA |              |

Bratu, S., Landman, D., George, A., Salvani, J. & Quale, J. Correlation of the expression of *acrB* and the regulatory genes *marA*, *soxS* and *ramA* with antimicrobial resistance in clinical isolates of *Klebsiella pneumoniae* endemic to New York City. J Antimicrob Chemother 64, 278-283 (2009).

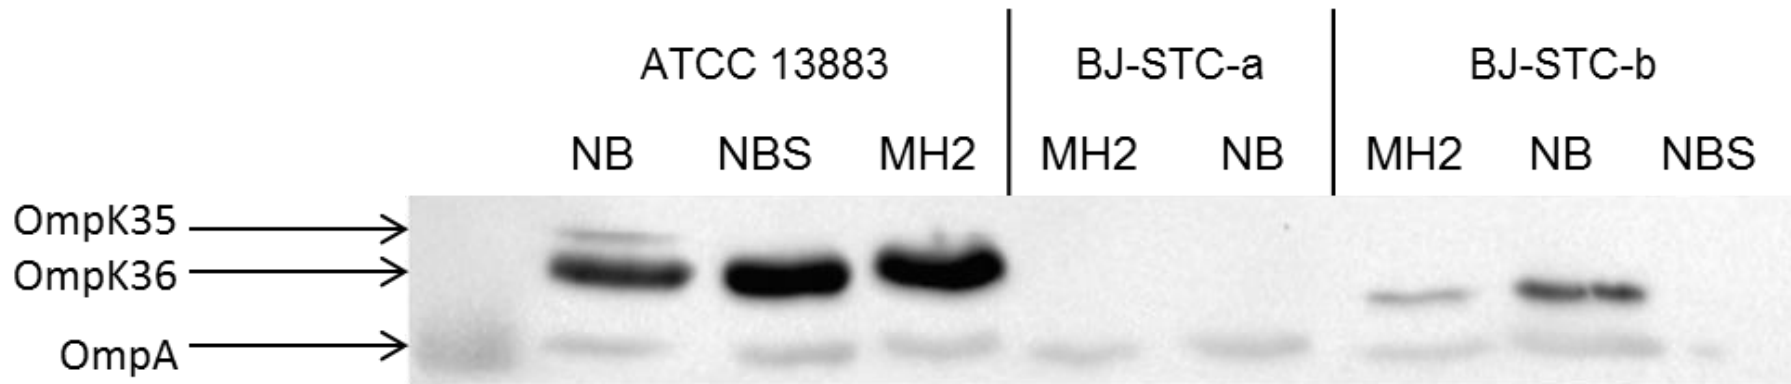

**Supplementary figure (Figure S1). Immunodetection of porins and OmpA.** After SDS-PAGE separation of denatured samples, the detection was performed with the polyclonal antibodies directed against denatured OmpF (OmpK35 in *Klebsiella pneumoniae*) porin and also against denatured OmpC (OmpK36 in *K. pneumoniae*) porin due to cross-recognition, and OmpA. The tested strains, ATCC13883, BJ-STC-a and BJ-STC-b, were grown in Mueller Hinton II (MH2), nutrient broth (NB) and nutrient broth containing sorbitol (NBS) media. A mix of anti-OmpA and anti-OmpF was used on the same nitrocellulose sheet to detect porins and OmpA.
